# Supplementary material
Source: HighWire-hosted journal article supplement (https://care.diabetesjournals.org/content/suppl/2012/10/15/35.11.2402)

SUPPLEMENTARY DATA

**Supplementary Table 1.** Search strategy performed at MedLine, at October 31, 2011

| Search | Medline search strategy                                   | Results |
|--------|-----------------------------------------------------------|---------|
| 1      | (metabolic syndrome)                                      | 38071   |
|        | <b>OR</b> (insulin-resistance syndrome)                   | 63450   |
|        | <b>OR</b> (syndrome X)                                    | 59523   |
| 2      | (colorectal cancer) <b>OR</b> (colorectal neoplasm)       | 141619  |
|        | (colon cancer) <b>OR</b> (colon neoplasm)                 | 93082   |
|        | (rectal cancer) <b>OR</b> (rectal neoplasm)               | 59653   |
| 3      | (gastric cancer) <b>OR</b> (gastric neoplasm)             | 86286   |
| 4      | (oesophageal cancer) <b>OR</b> (oesophageal neoplasm)     | 40341   |
| 5      | (hepatobiliary cancer) <b>OR</b> (hepatobiliary neoplasm) | 4167    |
|        | (liver cancer) <b>OR</b> (liver neoplasm)                 | 163880  |
|        | (gallbladder cancer) <b>OR</b> (gallbladder neoplasm)     | 9034    |
| 6      | (pancreas cancer) <b>OR</b> (pancreas neoplasm)           | 60045   |
| 7      | (lung cancer) <b>OR</b> (lung neoplasm)                   | 203484  |
| 8      | (bladder cancer) <b>OR</b> (bladder neoplasm)             | 52164   |
| 9      | (thyroid cancer) <b>OR</b> (thyroid neoplasm)             | 47066   |
| 10     | (renal cancer) <b>OR</b> (renal neoplasm)                 | 85275   |
| 11     | (leukemia)                                                | 236298  |
| 12     | (malignant melanoma)                                      | 83093   |
| 13     | (multiple myeloma)                                        | 32929   |
| 14     | (non-Hodgkin lymphoma)                                    | 78996   |
| 15     | (prostate cancer) <b>OR</b> (prostate neoplasm)           | 98003   |
| 16     | (breast cancer) <b>OR</b> (breast neoplasm)               | 240328  |
| 17     | (ovary cancer) <b>OR</b> (ovary neoplasm)                 | 71905   |
| 18     | (endometrium cancer) <b>OR</b> (endometrium neoplasm)     | 23007   |
| 19     | (metabolic syndrome) <b>AND</b> (cancer)                  | 3391    |
| 20     | 1 <b>AND</b> 2                                            | 130     |
| 21     | 1 <b>AND</b> 3                                            | 47      |
| 22     | 1 <b>AND</b> 4                                            | 17      |
| 23     | 1 <b>AND</b> 5                                            | 341     |
| 24     | 1 <b>AND</b> 6                                            | 86      |
| 25     | 1 <b>AND</b> 7                                            | 128     |
| 26     | 1 <b>AND</b> 8                                            | 20      |
| 27     | 1 <b>AND</b> 9                                            | 83      |
| 28     | 1 <b>AND</b> 10                                           | 168     |
| 29     | 1 <b>AND</b> 11                                           | 186     |
| 30     | 1 <b>AND</b> 12                                           | 38      |
| 31     | 1 <b>AND</b> 13                                           | 35      |
| 32     | 1 <b>AND</b> 14                                           | 50      |
| 33     | 1 <b>AND</b> 15                                           | 167     |
| 34     | 1 <b>AND</b> 16                                           | 168     |
| 35     | 1 <b>AND</b> 17                                           | 81      |
| 36     | 1 <b>AND</b> 18                                           | 42      |

SUPPLEMENTARY DATA

**Supplementary Table 2.** Datasets included in meta-analysis

| Number of datasets            | Author         | Site       | Design     | Outcome     | Cases  | RR, HR, OR, SIR | 95% CI    |  |
|-------------------------------|----------------|------------|------------|-------------|--------|-----------------|-----------|--|
| <b>Colorectal 38 datasets</b> |                |            |            |             |        |                 |           |  |
| 1                             | Trevisan 2001  | Colorectal | Cohort     | Mortality   | 4 M    | HR: 2.96        | 1.05-8.31 |  |
| 2                             | Trevisan 2001  | Colorectal | Cohort     | Mortality   | 2 W    | HR: 2.71        | 0.59-12.5 |  |
| 3                             | Colangelo 2002 | Colorectal | Cohort     | Mortality   | 191 M  | RR: 1.67        | 1.04-2.70 |  |
| 4                             | Colangelo 2002 | Colorectal | Cohort     | Mortality   | 126 W  | RR: 1.29        | 0.70-2.37 |  |
| 5                             | Ahmed 2006     | Colorectal | Cohort     | Incidence   | 107 M  | RR: 1.78        | 1.00-1.36 |  |
| 6                             | Ahmed 2006     | Colorectal | Cohort     | Incidence   | 87 W   | RR: 1.16        | 0.60-2.20 |  |
| 7                             | Bowers 2006    | Colorectal | Cohort RCT | Incidence   | 410 M  | HR: 1.40        | 1.12-1.74 |  |
| 8                             | Bowers 2006    | Colon      | Cohort RCT | Incidence   | 227 M  | HR: 1.58        | 1.18-2.10 |  |
| 9                             | Bowers 2006    | Rectal     | Cohort     | Incidence   | 183 M  | HR: 1.20        | 0.85-1.68 |  |
| 10                            | Sturmer 2006   | Colorectal | Cohort     | Incidence   | 494 M  | HR: 1.40        | 0.90-2.1  |  |
| 11                            | Russo 2008     | Colorectal | Cohort     | Incidence   | 60 M   | SIR: 0.91       | 0.70-1.17 |  |
| 12                            | Russo 2008     | Colorectal | Cohort     | Incidence   | 61 W   | SIR: 1.32       | 1.01-1.71 |  |
| 13                            | Russo 2008     | Colon      | Registry   | Incidence   | 44 M   | SIR: 0.92       | 0.67-1.23 |  |
| 14                            | Russo 2008     | Colon      | Registry   | Incidence   | 40 W   | SIR: 1.16       | 0.83-1.58 |  |
| 15                            | Russo 2008     | Rectal     | Registry   | Incidence   | 16 M   | SIR: 0.90       | 0.51-1.46 |  |
| 16                            | Russo 2008     | Rectal     | Registry   | Incidence   | 21 W   | SIR: 1.80       | 1.12-2.76 |  |
| 17                            | Stocks 2008    | Colorectal | n-c/c      | Association | 125 M  | OR: 1.57        | 0.53-4.70 |  |
| 18                            | Stocks 2008    | Colorectal | n-c/c      | Association | 181 W  | OR: 4.16        | 1.30-13.3 |  |
| 19                            | Inoue 2009     | Colon      | Cohort     | Incidence   | 102 M  | HR: 1.29        | 0.82-2.02 |  |
| 20                            | Inoue 2009     | Colon      | Cohort     | Incidence   | 106 W  | HR: 1.03        | 0.65-1.65 |  |
| 21                            | Inoue 2009     | Rectal     | Cohort     | Incidence   | 53 M   | HR: 0.62        | 0.29-1.34 |  |
| 22                            | Inoue 2009     | Rectal     | Cohort     | Incidence   | 51 W   | HR: 0.99        | 0.51-1.92 |  |
| 23                            | Matthews 2010  | Colorectal | Cohort     | Mortality   | 57 M   | HR: 1.71        | 0.97-3.02 |  |
| 24                            | Stocks 2010    | Colorectal | Cohort     | Incidence   | 2834 M | RR: 1.25        | 1.18-1.32 |  |
| 25                            | Stocks 2010    | Colorectal | Cohort     | Incidence   | 1861 W | RR: 1.14        | 1.06-1.22 |  |
| 26                            | Osaki 2011     | Colon      | Cohort R   | Incidence   | 64 M   | HR: 0.80        | 0.44-1.85 |  |

SUPPLEMENTARY DATA

|                                  |                  |                |            |             |           |           |           |  |
|----------------------------------|------------------|----------------|------------|-------------|-----------|-----------|-----------|--|
| 27                               | Osaki 2011       | Colon          | Cohort R   | Incidence   | 94 W      | HR: 1.08  | 0.63-1.85 |  |
| 28                               | Osaki 2011       | Rectal         | Cohort R   | Incidence   | 34 M      | HR: 2.04  | 0.84-4.93 |  |
| 29                               | Osaki 2011       | Rectal         | Cohort R   | Incidence   | 42 W      | HR: 0.86  | 0.35-2.14 |  |
| 30                               | Alexandrova 2001 | Colon          | n-c/c      | Association | 312 M     | RR: 1.70  | 1.15-2.50 |  |
| 31                               | Alexandrova 2001 | Colon          | n-c/c      | Association | 377 W     | RR: 2.25  | 1.55-3.26 |  |
| 32                               | Alexandrova 2001 | Rectal         | n-c/c      | Association | 219 M     | RR: 1.35  | 0.83-2.21 |  |
| 33                               | Alexandrova 2001 | Rectal         | n-c/c      | Association | 185 W     | RR: 2.03  | 1.14-3.62 |  |
| 34                               | Zhanlong 2010    | Colorectal     | c/c        | Survival    | 507 M & W | OR: 1.50  | 1.05-2.13 |  |
| 35                               | Pelucchi 2010    | Colon          | c/c        | Association | 780 M     | OR: 1.88  | 1.13-3.13 |  |
| 36                               | Pelucchi 2010    | Colon          | c/c        | Association | 598 W     | OR: 1.06  | 0.56-1.99 |  |
| 37                               | Pelucchi 2010    | Rectal         | c/c        | Association | 530 M     | OR: 1.96  | 1.13-3.40 |  |
| 38                               | Pelucchi 2010    | Rectal         | c/c        | Association | 348 W     | OR: 1.30  | 0.61-2.78 |  |
| <b>Breast 12 datasets</b>        |                  |                |            |             |           |           |           |  |
| 39                               | Russo 2008       | Pre and postM  | Registry   | Incidence   | 99 W      | SIR: 1.15 | 0.93-1.40 |  |
| 40                               | Kabat 2009       | Postmenopausal | Cohort RCT | Incidence   | 162 W     | HR: 1.12  | 0.78-1.62 |  |
| 41                               | Inoue 2009       | Pre and postM  | Cohort     | Incidence   | 120 W     | HR: 0.82  | 0.50-1.36 |  |
| 42                               | Bjorge 2010      | < 50 yrs       | Cohort     | Incidence   | 3043 W    | RR: 0.83  | 0.76-0.90 |  |
| 43                               | Bjorge 2010      | 50-59 yrs      | Cohort     | Incidence   | 1106 W    | RR: 0.95  | 0.87-1.04 |  |
| 44                               | Bjorge 2010      | > 60 yrs       | Cohort     | Incidence   | 713 W     | RR: 1.04  | 0.97-1.12 |  |
| 45                               | Osaki 2011       | Pre and postM  | Cohort R   | Incidence   | 77 W      | HR: 2.87  | 1.67-4.96 |  |
| 45 <sub>a</sub>                  | Osaki 2011       | Postmenopausal | Cohort R   | Incidence   | 44 W      | HR: 6.73  | 2.93-15.4 |  |
| 46                               | Agnoli 2010      | Postmenopausal | n-c/c      | Association | 163 W     | RR: 1.58  | 1.07-2.33 |  |
| 47                               | Capasso 2011     | Postmenopausal | n-c/c      | Association | 210 W     | OR: 1.61  | 1.07-1.77 |  |
| 48                               | Porto 2011       | Pre and postM  | c/c        | Association | 81 W      | OR: 2.49  | 1.17-5.30 |  |
| 49                               | Rosato 2011      | Postmenopausal | c/c        | Association | 3869 W    | OR: 1.75  | 1.37-2.22 |  |
| <b>Hepatobiliary 14 datasets</b> |                  |                |            |             |           |           |           |  |
| 50                               | Russo 2008       | Liver          | Registry   | Incidence   | 33 M      | SIR: 1.41 | 0.97-1.98 |  |
| 51                               | Russo 2008       | Liver          | Registry   | Incidence   | 5 W       | SIR: 0.57 | 0.18-1.32 |  |
| 52                               | Russo 2008       | Gallbladder    | Registry   | Incidence   | 54 M      | SIR: 1.09 | 0.82-1.43 |  |
| 53                               | Russo 2008       | Gallbladder    | Registry   | Incidence   | 10 W      | SIR: 0.91 | 0.44-1.68 |  |
| 54                               | Inoue 2009       | Liver          | Cohort     | Incidence   | 74 M      | HR: 1.73  | 1.03-2.91 |  |

SUPPLEMENTARY DATA

|                               |                   |             |          |             |                |           |           |  |
|-------------------------------|-------------------|-------------|----------|-------------|----------------|-----------|-----------|--|
| 55                            | Inoue 2009        | Liver       | Cohort   | Incidence   | 40 W           | HR: 1.18  | 0.55-2.51 |  |
| 56                            | Matthews 2010     | Liver       | Cohort   | Mortality   | 18 M           | HR: 1.62  | 0.59-4.41 |  |
| 57                            | Osaki 2011        | Liver       | Cohort R | Incidence   | 82 M           | HR: 1.89  | 1.11-3.22 |  |
| 58                            | Osaki 2011        | Liver       | Cohort R | Incidence   | 47 W           | HR: 3.67  | 1.78-7.57 |  |
| 59                            | Borena 2011       | Liver       | Cohort   | Incidence   | 195 M, 71 W    | RR: 1.35  | 1.12-1.61 |  |
| 60                            | Welzel 2011       | Liver HCC   | c/c      | Association | 2444 M, 1205 W | OR: 2.13  | 1.96-2.31 |  |
| 61                            | Welzel 2011       | Liver ICC   | c/c      | Association | 353 M, 390 W   | OR: 1.56  | 1.32-1.83 |  |
| 62                            | Shelb 2011        | Gallbladder | c/c      | Association | 368 M & W      | OR: 2.75  | 1.82-4.15 |  |
| 63                            | Shelb 2011        | Biliary     | c/c      | Association | 191 M & W      | OR: 1.92  | 1.07-3.42 |  |
| <b>Prostate 14 datasets</b>   |                   |             |          |             |                |           |           |  |
| 64                            | Laukkanen 2004    | Prostate    | Cohort   | Incidence   | 56 M           | RR: 1.9   | 1.10-3.50 |  |
| 65                            | Lund Håheim 2006  | Prostate    | Cohort   | Incidence   | 507 M          | RR: 1.56  | 1.21-2.00 |  |
| 66                            | Tande 2006        | Prostate    | Cohort   | Incidence   | 385 M          | RR: 0.77  | 0.60-0.98 |  |
| 67                            | Tuohimaa 2007     | Prostate    | n-c/c    | Association | 132 M          | OR: 3.36  | 1.19-9.44 |  |
| 68                            | Russo 2008        | Prostate    | Registry | Incidence   | 94 M           | SIR: 0.93 | 0.75-1.14 |  |
| 69                            | Jagger 2009       | Prostate    | Cohort   | Mortality   | 34 M           | HR: 1.32  | 0.65-2.77 |  |
| 70                            | Inoue 2009        | Prostate    | Cohort   | Incidence   | 119 M          | HR: 0.76  | 0.47-1.22 |  |
| 71                            | Martin 2009       | Prostate    | Cohort   | Incidence   | 687 M          | HR: 0.91  | 0.71-1.09 |  |
| 72                            | Wallner 2010      | Prostate    | Cohort   | Incidence   | 206 M          | HR: 0.65  | 0.37-1.10 |  |
| 73                            | Grundmark 2010    | Prostate    | Cohort   | Incidence   | 237 M          | RR: 1.29  | 0.89-1.88 |  |
| 74                            | Osaki 2011        | Prostate    | Cohort R | Incidence   | 152 M          | HR: 1.22  | 0.79-1.87 |  |
| 75                            | Beebe-Dimmer 2009 | Prostate    | c/c      | Association | 637 M Whites   | OR: 1.02  | 0.64-1.62 |  |
| 76                            | Pelucchi 2011     | Prostate    | c/c      | Association | 1294 M         | OR: 1.66  | 1.22-1.28 |  |
| 77                            | De Nunzio 2011    | Prostate    | Series   | Association | 83 M           | OR: 0.97  | 0.48-1.95 |  |
| <b>Endometrium 5 datasets</b> |                   |             |          |             |                |           |           |  |
| 78                            | Cust 2007         | Endometrium | n-c/c    | Association | 284 W          | RR: 2.12  | 1.51-2.97 |  |
| 79                            | Russo 2008        | Endometrium | Registry | Incidence   | 20 W           | SIR: 1.56 | 0.95-2.41 |  |
| 80                            | Bjørge 2011       | Endometrium | Cohort   | Incidence   | 917 W          | RR: 1.37  | 1.28-1.46 |  |
| 81                            | Rosato 2011       | Endometrium | c/c      | Association | 454 W          | OR: 1.67  | 0.99-2.81 |  |
| 82                            | Friedenreich 2011 | Endometrium | c/c      | Association | 515 W          | OR: 1.57  | 1.18-2.08 |  |
| <b>Pancreas 9 datasets</b>    |                   |             |          |             |                |           |           |  |

SUPPLEMENTARY DATA

|                           |                |          |           |             |        |           |           |  |
|---------------------------|----------------|----------|-----------|-------------|--------|-----------|-----------|--|
| 83                        | Russo 2008     | Pancreas | Registry  | Incidence   | 24 M   | SIR: 1.78 | 1.14-2.66 |  |
| 84                        | Russo 2008     | Pancreas | Registry  | Incidence   | 19 W   | SIR: 1.45 | 0.87-2.26 |  |
| 85                        | Inoue 2009     | Pancreas | Cohort    | Incidence   | 24 M   | HR: 0.28  | 0.07-1.22 |  |
| 86                        | Inoue 2009     | Pancreas | Cohort    | Incidence   | 41 W   | HR: 1.80  | 0.94-3.45 |  |
| 87                        | Johansen 2010  | Pancreas | Cohort    | Incidence   | 545 M  | RR: 1.07  | 0.94-1.11 |  |
| 88                        | Johansen 2010  | Pancreas | Cohort    | Incidence   | 315 W  | RR: 1.58  | 1.34-1.87 |  |
| 89                        | Matthews 2010  | Pancreas | Cohort    | Mortality   | 56 M   | HR: 1.38  | 0.76-2.49 |  |
| 90                        | Rosato 2011    | Pancreas | c/c       | Association | 174 M  | OR: 2.08  | 0.90-4.74 |  |
| 91                        | Rosato 2011    | Pancreas | c/c       | Association | 152 W  | OR: 1.68  | 0.40-7.14 |  |
| <b>Gastric 7 datasets</b> |                |          |           |             |        |           |           |  |
| 92                        | Russo 2008     | Gastric  | Registry  | Incidence   | 25 M   | SIR: 1.15 | 0.75-1.17 |  |
| 93                        | Russo 2008     | Gastric  | Registry  | Incidence   | 4 W    | SIR: 0.28 | 0.07-0.73 |  |
| 94                        | Inoue 2009     | Gastric  | Cohort    | Incidence   | 233 M  | HR: 0.87  | 0.62-1.21 |  |
| 95                        | Inoue 2009     | Gastric  | Cohort    | Incidence   | 138 W  | HR: 0.77  | 0.49-1.21 |  |
| 96                        | Matthews 2010  | Gastric  | Cohort    | Mortality   | 22 M   | HR: 0.45  | 0.16-1.3  |  |
| 97                        | Osaki 2011     | Gastric  | Cohort R. | Incidence   | 226 M  | HR: 0.74  | 0.50-1.10 |  |
| 98                        | Osaki 2011     | Gastric  | Cohort R. | Incidence   | 167 W  | HR: 0.98  | 0.65-1.49 |  |
| <b>Lung 7 datasets</b>    |                |          |           |             |        |           |           |  |
| 99                        | Russo 2008     | Lung     | Registry  | Incidence   | 100 M  | SIR: 1.07 | 0.87-1.30 |  |
| 100                       | Russo 2008     | Lung     | Registry  | Incidence   | 18 W   | SIR: 0.66 | 0.39-1.04 |  |
| 101                       | Inoue 2009     | Lung     | Cohort    | Incidence   | 149 M  | HR: 0.86  | 0.57-1.30 |  |
| 102                       | Inoue 2009     | Lung     | Cohort    | Incidence   | 75 W   | HR: 0.66  | 0.35-1.24 |  |
| 103                       | Jagger 2009    | Lung     | Cohort    | Mortality   | 157 M  | HR: 1.47  | 1.04-2.05 |  |
| 104                       | Osaki 2011     | Lung     | Cohort R  | Incidence   | 130 M  | HR: 0.48  | 0.26-0.91 |  |
| 105                       | Osaki 2011     | Lung     | Cohort R  | Incidence   | 81 W   | HR: 1.05  | 0.58-1.89 |  |
| <b>Bladder 4 datasets</b> |                |          |           |             |        |           |           |  |
| 106                       | Russo 2008     | Bladder  | Registry  | Incidence   | 54 M   | SIR: 1.09 | 0.82-1.43 |  |
| 107                       | Russo 2008     | Bladder  | Registry  | Incidence   | 10 W   | SIR: 0.91 | 0.44-1.68 |  |
| 108                       | Häggström 2011 | Bladder  | Cohort    | Incidence   | 1587 M | RR: 1.10  | 1.01-1.18 |  |
| 109                       | Häggström 2011 | Bladder  | Cohort    | Incidence   | 327 W  | RR: 0.95  | 0.79-1.14 |  |
| <b>Thyroid 4 datasets</b> |                |          |           |             |        |           |           |  |

SUPPLEMENTARY DATA

|                         |               |         |          |           |       |           |           |  |
|-------------------------|---------------|---------|----------|-----------|-------|-----------|-----------|--|
| 110                     | Russo 2008    | Thyroid | Registry | Incidence | 4 M   | SIR: 2.07 | 0.56-5.31 |  |
| 111                     | Russo 2008    | Thyroid | Registry | Incidence | 3 W   | SIR: 0.90 | 0.18-2.62 |  |
| 112                     | Almquist 2011 | Thyroid | Cohort   | Incidence | 133 M | RR: 1.13  | 0.94-1.35 |  |
| 113                     | Almquist 2011 | Thyroid | Cohort   | Incidence | 255 W | RR: 1.00  | 0.87-1.15 |  |
| <b>Ovary 2 datasets</b> |               |         |          |           |       |           |           |  |
| 114                     | Russo 2008    | Ovary   | Registry | Incidence | 10 W  | SIR: 1.56 | 0.95-2.41 |  |
| 115                     | Bjørge 2011   | Ovary   | Cohort   | Incidence | 644 W | RR: 1.17  | 0.89-1.53 |  |

M =men; W =women; RR =relative risk; HR =hazard ratio; OR =odds ratio; SIR: standardized incidence ratio; RCT =randomized controlled tria; postM = postpostmenopausal; c/c =case-control; n-c/c =nested case-control; cohort R =retrospective

**Supplementary Table 3.** Baseline characteristics of studies included in meta-analysis

| First author reference (main paper)          | Country | Design             | Sex   | Men cases | Women cases | Cohort or controls | Endpoint    | Mean FU years | MS traditional | Number of CSSRF                           | Quality score (0-3) |
|----------------------------------------------|---------|--------------------|-------|-----------|-------------|--------------------|-------------|---------------|----------------|-------------------------------------------|---------------------|
| <b>Colorectal (14 articles, 38 datasets)</b> |         |                    |       |           |             |                    |             |               |                |                                           |                     |
| <b>Trevisan 2001<sup>8</sup></b>             | Italy   | Cohort             | M & W | 4         | 2           | 21311 M            | Mortality   | 7             | No             | 2 (age, alcohol)                          | 1                   |
| <b>Colangelo 2002<sup>9</sup></b>            | USA     | Cohort             | M & W | 191       | 126         | 20433 M<br>15149 W | Mortality   | 26.2          | No             | 1 (age)                                   | 1                   |
| <b>Ahmed 2006<sup>10</sup></b>               | USA     | Cohort             | M & W | 107       | 87          | 6630 M<br>7563 W   | Incidence   | 11.5          | Yes            | 5 (age, alcohol, family history, HRT, PA) | 3                   |
| <b>Bowers 2006<sup>11</sup></b>              | Finland | RCT                | M     | 410       |             | 28983 M            | Incidence   | 14.1          | No             | 4 (age, alcohol, PA, diet)                | 2                   |
| <b>Sturmer 2006<sup>12</sup></b>             | USA     | Cohort             | M     | 494       |             | 22046 M            | Incidence   | 19            | No             | 4 (age, alcohol, exercise, fruit)         | 2                   |
| <b>Russo 2008<sup>13</sup></b>               | Italy   | Cohort<br>Registry | M & W | 60        | 61          | 16677 M+W          | Incidence   | 2.7           | No             | 0                                         | 0                   |
| <b>Stock 2008<sup>14</sup></b>               | Sweden  | n-c/c              | M & W | 125       | 181         | 595 controls       | Association |               | No             | 0                                         | 0                   |
| <b>Inoue 2009<sup>15</sup></b>               | Japan   | Cohort             | M & W | 155       | 157         | 9548 M<br>18176 W  | Incidence   | 10.2          | Yes            | 3 (age, alcohol, PA)                      | 3                   |

SUPPLEMENTARY DATA

|                                         |             |                         |       |      |      |               |             |      |     |                                                             |   |
|-----------------------------------------|-------------|-------------------------|-------|------|------|---------------|-------------|------|-----|-------------------------------------------------------------|---|
| <b>Matthews 2010<sup>16</sup></b>       | USA         | Cohort                  | M     | 57   |      | 33230 M       | Mortality   | 14.4 | Yes | 3 (age, alcohol, family history)                            | 3 |
| <b>Stocks 2010<sup>17</sup></b>         | Norway      | Cohort                  | M & W | 2834 | 1861 | 289866 M      | Incidence   | 12   | No  | 1 (age)                                                     | 1 |
|                                         | Sweden      |                         |       |      |      | 288834 W      |             |      |     |                                                             |   |
|                                         | Austria     |                         |       |      |      |               |             |      |     |                                                             |   |
| <b>Osaki 2011<sup>18</sup></b>          | Japan       | Cohort R                | M & W | 98   | 136  | 8329 M        | Incidence   | 9.1  | Yes | 2 (age, alcohol)                                            | 2 |
|                                         |             |                         |       |      |      | 15386 W       |             |      |     |                                                             |   |
| <b>Alexandrova 2011<sup>19</sup></b>    | Europe      | n-c/c                   | M & W | 531  | 562  | 1093 controls | Association | 3.7  | Yes | 5 (age, alcohol, PA, fruit, diet)                           | 2 |
| <b>Shen 2010<sup>20</sup></b>           | China       | c/c                     | M & W | 285  | 222  | 507           | Survival    |      | No  | 2 (age, family history)                                     | 1 |
| <b>Pelucchi 2010<sup>21</sup></b>       | Italy       | c/c                     | M & W | 1310 | 946  | 4661          | Association |      | No  | 4 (age, alcohol, PA, diet)                                  | 1 |
|                                         | Switzerland |                         |       |      |      |               |             |      |     |                                                             |   |
| <b>Breast (9 articles, 12 datasets)</b> |             |                         |       |      |      |               |             |      |     |                                                             |   |
| <b>Russo 2008<sup>13</sup></b>          | Italy       | Cohort registry         | W     |      | 99   | 16677 M+W     | Incidence   | 2.7  | No  | 0                                                           | 0 |
| <b>Kabat 2009<sup>22</sup></b>          | USA         | RCT Cohort              | W     |      | 162  | 4936          | Incidence   | 8    | Yes | 6 (age, alcohol, OC, HRT, age at menopause, family history) | 3 |
|                                         |             | Postmenopausal          |       |      |      | 1054          |             |      |     |                                                             |   |
| <b>Inoue 2009<sup>15</sup></b>          | Japan       | Cohort                  | W     |      | 120  | 18176         | Incidence   | 10.2 | Yes | 2 (age, alcohol)                                            | 2 |
| <b>Bjorge 2010<sup>23</sup></b>         | Austria     | Cohort                  | W     |      | 4862 | 287320        | Incidence   | 11   | No  | 2 (age, age at the childbirth, parity)                      | 2 |
|                                         | Sweden      | 1 cohort postmenopausal |       |      |      |               |             |      |     |                                                             |   |
|                                         | Norway      |                         |       |      |      |               |             |      |     |                                                             |   |
| <b>Osaki 2011<sup>18</sup></b>          | Japan       | Cohort R                | W     |      | 77   | 15386         | Incidence   | 9.1  | Yes | 2 (age, alcohol)                                            | 2 |
|                                         |             | Postmenopausal          |       |      |      |               |             |      |     |                                                             |   |
| <b>Agnoli 2010<sup>24</sup></b>         | Italy       | n-c/c                   | W     |      | 163  | 629 controls  | Association | 13.5 | Yes | 5 (age, parity, alcohol, OC, family history)                | 3 |
|                                         |             | Postmenopausal          |       |      |      |               |             |      |     |                                                             |   |
| <b>Capasso 2011<sup>25</sup></b>        | Italy       | n-c/c                   | W     |      | 210  | 289 controls  | Association |      | Yes | 6 (age, parity, HRT, OC, family history, menarche)          | 2 |
|                                         |             | Postmenopausal          |       |      |      |               |             |      |     |                                                             |   |

SUPPLEMENTARY DATA

|                                                |              |                |       |      |      |           |             |      |     |                                                        |   |
|------------------------------------------------|--------------|----------------|-------|------|------|-----------|-------------|------|-----|--------------------------------------------------------|---|
| <b>Porto 2011<sup>26</sup></b>                 | Brazil       | c/c            | W     |      | 81   | 83        | Association |      | Yes | 0                                                      | 1 |
|                                                |              |                |       |      |      | controls  |             |      |     |                                                        |   |
| <b>Rosato 2011<sup>27</sup></b>                | Italy        | c/c            | W     |      | 3869 | 4082      | Association |      | No  | 7 (age, alcohol, menarche,                             | 1 |
|                                                | Switzer-land | Postmenopausal |       |      |      | controls  |             |      |     | parity, HRT, age at menopause<br>family history)       |   |
| <b>Hepatobiliary (7 articles, 14 datasets)</b> |              |                |       |      |      |           |             |      |     |                                                        |   |
| <b>Russo 2008<sup>13</sup></b>                 | Italy        | Cohort         | M & W | 87   | 15   | 16677 M+W | Incidence   | 2.7  | No  | 0                                                      | 0 |
|                                                |              | Registry       |       |      |      |           |             |      |     |                                                        |   |
| <b>Inoue 2009<sup>15</sup></b>                 | Japan        | Cohort         | M & W | 74   | 40   | 9548 M    | Incidence   | 10.2 | Yes | 2 (age, alcohol)                                       | 3 |
|                                                |              |                |       |      |      | 18176 W   |             |      |     |                                                        |   |
| <b>Matthew 2010<sup>16</sup></b>               | USA          | Cohort         | M     | 18   |      | 33230 M   | Mortality   | 14.4 | Yes | 2 (age, alcohol)                                       | 3 |
| <b>Osaki 2011<sup>18</sup></b>                 | Japan        | Cohort R       | M & W | 82   | 47   | 8329 M    | Incidence   | 9.1  | Yes | 2 (ag, alcohol)                                        | 3 |
|                                                |              |                |       |      |      | 15386 W   |             |      |     |                                                        |   |
| <b>Borena 2011<sup>28</sup></b>                | Norway       | Cohort         | M & W | 195  | 71   | 289866 M  | Incidence   | 12   | No  | 2 (age, alcohol)                                       | 2 |
|                                                | Sweden       |                |       |      |      | 288834 W  |             |      |     |                                                        |   |
|                                                | Austria      |                |       |      |      |           |             |      |     |                                                        |   |
| <b>Shelb 2011<sup>29</sup></b>                 | China        | c/c            | M & W |      |      | 959       | Association |      | Yes | 1 (age)                                                | 1 |
|                                                |              |                |       |      |      | 559       | controls    |      |     |                                                        |   |
| <b>Welzel 2011<sup>30</sup></b>                | USA          | c/c            | M & W | 2797 | 1595 | 195 953   | Association |      | No  | 1 (age)                                                | 0 |
|                                                |              |                |       |      |      | controls  |             |      |     |                                                        |   |
| <b>Prostate (14 articles, 14 datasets)</b>     |              |                |       |      |      |           |             |      |     |                                                        |   |
| <b>Laukkanen<sup>31</sup></b>                  | Norway       | Cohort         | M     | 56   |      | 1880      | Incidence   | 13   | Yes | 3 (age, vitamin E, fat diet)                           | 3 |
| <b>2004</b>                                    |              |                |       |      |      |           |             |      |     |                                                        |   |
| <b>Lund-Haeim<sup>32</sup></b>                 | Norway       | Cohort         | M     | 507  |      | 15933     | Incidence   | 27   | No  | 1 (age)                                                | 1 |
| <b>2006</b>                                    |              |                |       |      |      |           |             |      |     |                                                        |   |
| <b>Tande 2006<sup>33</sup></b>                 | USA          | Cohort         | M     | 385  |      | 6429      | Incidence   | 11.5 | Yes | 4 (age, family history, milk<br>intake, energy intake) | 3 |
|                                                |              |                |       |      |      |           |             |      |     |                                                        |   |
| <b>Tuohimaa 2007<sup>34</sup></b>              | Finland      | n-c/c          | M     | 132  |      | 456       | Association |      | No  | 1 (vitamin D)                                          | 0 |



SUPPLEMENTARY DATA

|                                             |         |          |   |      |     |           |             |      |     |                                       |   |
|---------------------------------------------|---------|----------|---|------|-----|-----------|-------------|------|-----|---------------------------------------|---|
|                                             |         |          |   |      |     | controls  |             |      |     |                                       |   |
| <b>Russo 2008<sup>13</sup></b>              | Italy   | Cohort   | M | 94   |     | 16677 M+W | Incidence   | 2.7  | No  | 0                                     | 0 |
|                                             |         | registry |   |      |     |           |             |      |     |                                       |   |
| <b>Jagger 2009<sup>35</sup></b>             | USA     | Cohort   | M | 34   |     | 33230     | Mortality   | 14   | Yes | 2 (age, family history)               | 2 |
| <b>Inoue 2009<sup>15</sup></b>              | Japan   | Cohort   | M | 119  |     | 9548      | Incidence   | 10.2 | Yes | 1 (age)                               | 2 |
| <b>Martin 2009<sup>36</sup></b>             | Norway  | Cohort   | M | 687  |     | 29364     | Incidence   | 9.3  | Yes | 1 (age)                               | 2 |
| <b>Wallner 2010<sup>37</sup></b>            | USA     | Cohort   | M | 206  |     | 475       | incidence   | 15   | No  | 2 (age, family history)               | 1 |
| <b>Grundmark<sup>38</sup></b>               | Sweden  | Cohort   | M | 237  |     | 2322      | Incidence   | 34   | Yes | 1 (age)                               | 2 |
| <b>2010</b>                                 |         |          |   |      |     |           |             |      |     |                                       |   |
| <b>Osaki 2011<sup>18</sup></b>              | Japan   | Cohort R | M | 152  |     | 8329      | Incidence   | 9.1  | Yes | 1 (age)                               | 2 |
| <b>Beebe-Dimmer<sup>39</sup></b>            | USA     | c/c      | M | 637  |     | 244       | Association |      | No  | 2 (age, vitamin E)                    | 0 |
| <b>2009</b>                                 |         |          |   |      |     | controls  |             |      |     |                                       |   |
| <b>Pelucchi 2011<sup>40</sup></b>           | Italy   | c/c      | M | 1294 |     | 1451      | Association |      | No  | 2 (age, family history)               | 0 |
|                                             |         |          |   |      |     | controls  |             |      |     |                                       |   |
| <b>De Nunzio 2011<sup>41</sup></b>          | Italy   | Series   | M | 83   |     | 195       | Association |      | Yes | 2 (age, testosterone)                 | 1 |
| <b>Endometrium (5 articles, 5 datasets)</b> |         |          |   |      |     |           |             |      |     |                                       |   |
| <b>Cust 2007<sup>42</sup></b>               | Europe  | n-c/c    | W |      | 284 | 546       | Association | 3    | Yes | 4 (age at menopause, HRT, OC, parity) | 3 |
|                                             |         |          |   |      |     | controls  |             |      |     |                                       |   |
| <b>Russo 2008<sup>13</sup></b>              | Italy   | Cohort   | W |      | 20  | 16677 M+W | Incidence   | 2.7  | No  | 0                                     | 0 |
|                                             |         | registry |   |      |     |           |             |      |     |                                       |   |
| <b>Bjorge 2011<sup>43</sup></b>             | Austria | Cohort   | W |      | 917 | 287320 W  | Incidence   | 10   | No  | 3 (age, BMI, parity)                  | 2 |
|                                             | Sweden  |          |   |      |     |           |             |      |     |                                       |   |
|                                             | Norway  |          |   |      |     |           |             |      |     |                                       |   |
| <b>Rosato 2011<sup>44</sup></b>             | Italy   | c/c      | W |      | 454 | 789       | Association |      | No  | 4 (age, parity, OC, HRT)              | 1 |
|                                             |         |          |   |      |     | controls  |             |      |     |                                       |   |
| <b>Friedenreich<sup>45</sup></b>            | Canada  | c/c      | W |      | 515 | 962       | Association |      | Yes | 3 (age, parity, HRT)                  | 2 |
| <b>2011</b>                                 |         |          |   |      |     | controls  |             |      |     |                                       |   |
| <b>Pancreas (5 articles, 9 datasets)</b>    |         |          |   |      |     |           |             |      |     |                                       |   |

SUPPLEMENTARY DATA

|                                         |         |          |       |     |     |           |             |      |     |                   |   |
|-----------------------------------------|---------|----------|-------|-----|-----|-----------|-------------|------|-----|-------------------|---|
| <b>Russo 2008<sup>13</sup></b>          | Italy   | Cohort   | M & W | 24  | 19  | 16677 M+W | Incidence   | 2.7  | No  | 0                 | 0 |
|                                         |         | registry |       |     |     |           |             |      |     |                   |   |
| <b>Inoue 2009<sup>15</sup></b>          | Japan   | Cohort   | M & W | 24  | 41  | 9548 M    | Incidence   | 10.2 | Yes | 2 (age, smoking)  | 3 |
|                                         |         |          |       |     |     | 18176 W   |             |      |     |                   |   |
| <b>Johansen 2010<sup>46</sup></b>       | Austria | Cohort   | M & W | 545 | 315 | 288976 M  | Incidence   | 12.8 | No  | 2 (age, smoking)  | 2 |
|                                         | Norway  |          |       |     |     | 288339 W  |             | 11.3 |     |                   |   |
|                                         | Sweden  |          |       |     |     |           |             |      |     |                   |   |
| <b>Matthews 2010<sup>16</sup></b>       | USA     | Cohort   | M     | 56  |     | 33230     | Mortality   | 14.4 | Yes | 2 (age smoking)   | 3 |
| <b>Rosato 2011<sup>47</sup></b>         | Italy   | c/c      | M & W | 174 | 152 | 652       | Association |      | No  | 2 (age , smoking) | 1 |
|                                         |         |          |       |     |     | controls  |             |      |     |                   |   |
| <b>Gastric (4 articles, 7 datasets)</b> |         |          |       |     |     |           |             |      |     |                   |   |
| <b>Russo 2008<sup>13</sup></b>          | Italy   | Cohort   | M & W | 25  | 4   | 16677 M+W | Incidence   | 2.7  | No  | 0                 | 0 |
|                                         |         | registry |       |     |     |           |             |      |     |                   |   |
| <b>Inoue 2009<sup>15</sup></b>          | Japan   | Cohort   | M & W | 233 | 138 | 9548 M    | Incidence   | 10.2 | Yes | 1 (age)           | 2 |
|                                         |         |          |       |     |     | 18176 W   |             |      |     |                   |   |
| <b>Matthews 2010<sup>16</sup></b>       | USA     | Cohort   | M     | 22  |     | 33230     | Mortality   | 14.4 | Yes | 1 (age)           | 2 |
|                                         |         |          |       |     |     |           |             |      |     |                   |   |
| <b>Osaki 2011<sup>18</sup></b>          | Japan   | Cohort R | M & W | 226 | 167 | 8239 M    | Incidence   | 9.1  | Yes | 1 (age)           | 2 |
| <b>Lung (4 articles, 7 datasets)</b>    |         |          |       |     |     |           |             |      |     |                   |   |
| <b>Russo 2008<sup>13</sup></b>          | Italy   | Cohort   | M & W | 100 | 18  | 16677 M+W | Incidence   | 2.7  | No  | 0                 | 0 |
|                                         |         | registry |       |     |     |           |             |      |     |                   |   |
| <b>Inoue 2009<sup>15</sup></b>          | Japan   | Cohort   | M & W | 149 | 75  | 9548 M    | Incidence   | 10.2 | Yes | 2 (age, smoking)  | 3 |
|                                         |         |          |       |     |     | 18176 W   |             |      |     |                   |   |
| <b>Jagger 2009<sup>35</sup></b>         | USA     | Cohort   | M     | 157 |     | 33230 M   | Mortality   | 14   | Yes | 2 (age, smoking)  | 3 |
| <b>Osaki 2011<sup>18</sup></b>          | Japan   | Cohort R | M & W | 130 | 81  | 8329 M    | Incidence   | 9.1  | Yes | 2 (age, smoking)  | 3 |
|                                         |         |          |       |     |     | 15386 W   |             |      |     |                   |   |
| <b>Bladder (2 articles, 4 datasets)</b> |         |          |       |     |     |           |             |      |     |                   |   |
| <b>Russo 2008<sup>13</sup></b>          | Italy   | Cohort   | M & W | 54  | 10  | 16677 M+W | Incidence   | 2.7  | No  | 1 (age)           | 0 |
|                                         |         | registry |       |     |     |           |             |      |     |                   |   |

SUPPLEMENTARY DATA

|                                         |         |          |       |      |     |           |           |     |    |         |   |
|-----------------------------------------|---------|----------|-------|------|-----|-----------|-----------|-----|----|---------|---|
| <b>Hägström<sup>48</sup></b>            | Norway  | Cohort   | M & W | 1587 | 327 | 289866 M  | Incidence | 12  | No | 1 (age) |   |
| 2011                                    | Austria |          |       |      |     | 288834 W  |           |     |    |         | 1 |
|                                         | Sweden  |          |       |      |     |           |           |     |    |         |   |
| <b>Thyroid (2 articles, 4 datasets)</b> |         |          |       |      |     |           |           |     |    |         |   |
| <b>Russo 2008<sup>13</sup></b>          | Italy   | Cohort   | M & W | 4    | 3   | 16677 M+W | Incidence | 2.7 | No | 0       | 0 |
|                                         |         | registry |       |      |     |           |           |     |    |         |   |
| <b>Almquist 2011<sup>49</sup></b>       | Norway  | Cohort   | M & W | 133  | 255 | 289866 M  | Incidence | 12  | No | 1 (age) | 1 |
|                                         | Austria |          |       |      |     | 288834 W  |           |     |    |         |   |
|                                         | Sweden  |          |       |      |     |           |           |     |    |         |   |
| <b>Ovary (2 articles, 2 datasets)</b>   |         |          |       |      |     |           |           |     |    |         |   |
| <b>Russo 2008<sup>13</sup></b>          | Italy   | Cohort   | M & W |      | 10  | 16677 M+W | Incidence | 2.7 | No | 0       | 0 |
|                                         |         | registry |       |      |     |           |           |     |    |         |   |
| <b>Bjørge 2011<sup>50</sup></b>         | Norway  | Cohort   | W     |      | 644 | 287320 W  | Incidence | 11  | No | 1 (age) | 1 |
|                                         | Austria |          |       |      |     |           |           |     |    |         |   |
|                                         | Sweden  |          |       |      |     |           |           |     |    |         |   |

M & W =men & women; FU =follow up; MS =metabolic syndrome; CSSRF: cancer site-specific risk factors; HRT: hormone replacement Therapy; OC =oral contraceptives; PA =physical activity; BMI =body mass index; c/c =case-control study; n-c/c =nested case-control study

SUPPLEMENTARY DATA

Supplementary Figure 1. Articles identified and screened for eligibility

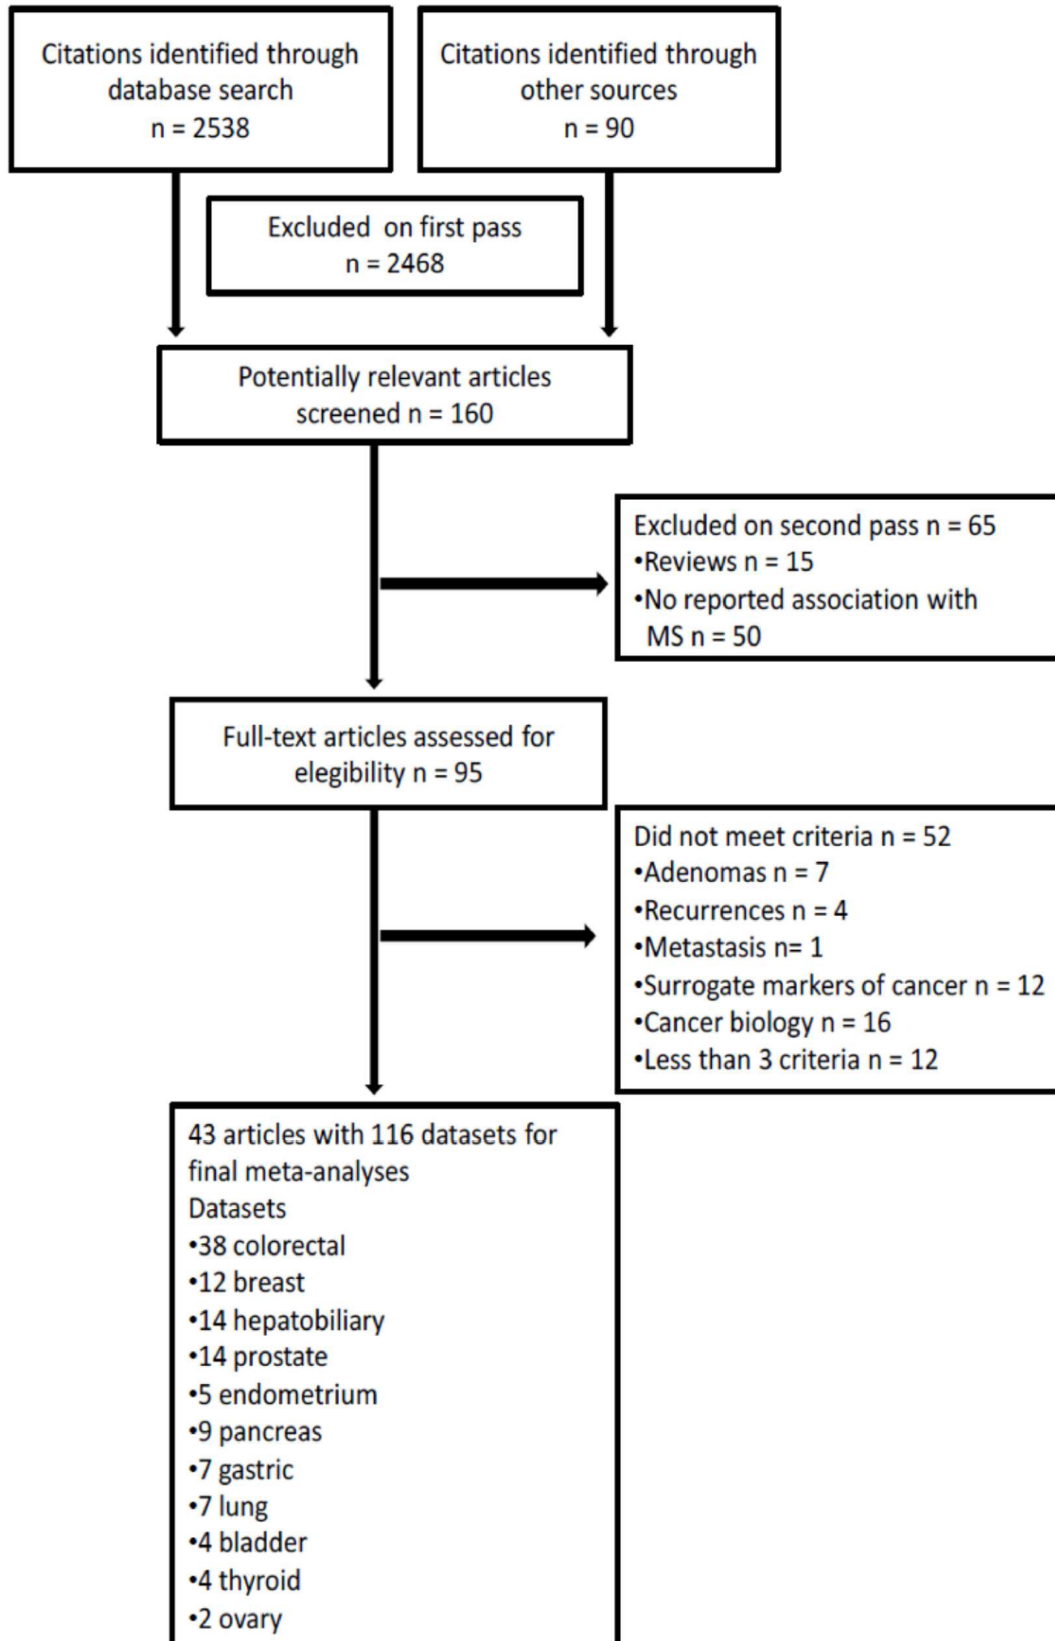

Supplement: DC120336SupplementaryData.pdf [file DC120336SupplementaryData.pdf]
